# Supplementary material for: Analysis of microRNA and Gene Expression Profiles in Multiple Sclerosis: Integrating Interaction Data to Uncover Regulatory Mechanisms
Source: PubMed Central journal article supplement (PMC5046091; doi:10.1038/srep34512), 2016-10-03
Supplement: srep34512-s1.pdf [file srep34512-s1.pdf]

# Analysis of microRNA and Gene Expression Profiles in Multiple Sclerosis: Integrating Interaction Data to Uncover Regulatory Mechanisms

Sherry Freiesleben<sup>1,2</sup>, Michael Hecker<sup>3</sup>, Uwe Klaus Zettl<sup>3</sup>, Georg Fuellen<sup>2,4</sup>, Leila Taher<sup>2,5,\*</sup>

<sup>1</sup> Department of Systems Biology and Bioinformatics, University of Rostock, Rostock, Germany.

<sup>2</sup> Institute for Biostatistics and Informatics in Medicine and Ageing Research, University of Rostock, Rostock, Germany.

<sup>3</sup> Department of Neurology, Division of Neuroimmunology, University of Rostock, Rostock, Germany.

<sup>4</sup> Interdisciplinary Faculty, University of Rostock, Rostock, Germany.

<sup>5</sup> Division of Bioinformatics, Department of Biology, Friedrich-Alexander Universität Erlangen-Nürnberg, Erlangen, Germany.

\* **Corresponding authors:** E-mail: [leila.taher@fau.de](mailto:leila.taher@fau.de)

# Supplementary Tables and Figures

---

## Contents

|                               |    |
|-------------------------------|----|
| Supplementary Figure 1 .....  | 3  |
| Supplementary Figure 2 .....  | 4  |
| Supplementary Figure 3 .....  | 5  |
| Supplementary Figure 4 .....  | 6  |
| Supplementary Figure 5 .....  | 7  |
| Supplementary Figure 6 .....  | 8  |
| Supplementary Figure 7 .....  | 9  |
| Supplementary Figure 8 .....  | 10 |
| Supplementary Figure 9 .....  | 11 |
| Supplementary Figure 10 ..... | 12 |
| Supplementary Figure 11 ..... | 13 |
| Supplementary Figure 12 ..... | 14 |
| Supplementary Figure 13 ..... | 15 |
| Supplementary Figure 14 ..... | 16 |
| Supplementary Figure 15 ..... | 17 |
| Supplementary Table 1 .....   | 18 |
| Supplementary Table 2 .....   | 19 |
| Supplementary Table 3 .....   | 20 |
| Supplementary Table 4 .....   | 21 |
| Supplementary Table 5 .....   | 23 |
| References.....               | 24 |

**Supplementary Figure 1**

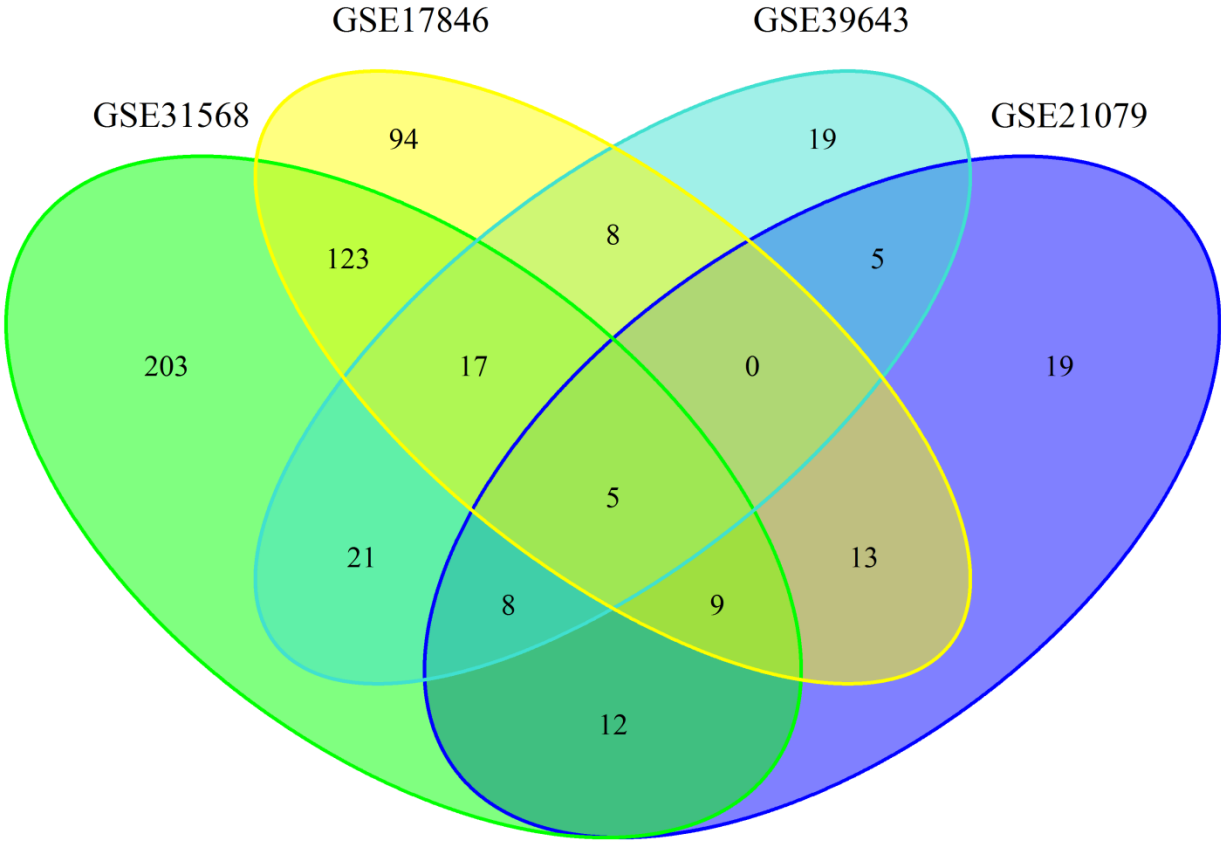

**Supplementary Figure 1: Venn diagram of overlapping differentially expressed microRNAs.** This figure depicts the overlap of the differentially expressed microRNAs (miRNAs) with a p-value<0.05 between the different miRNA microarray datasets. The direction in which the miRNAs were regulated was not taken into consideration to construct this Venn diagram.

## Supplementary Figure 2

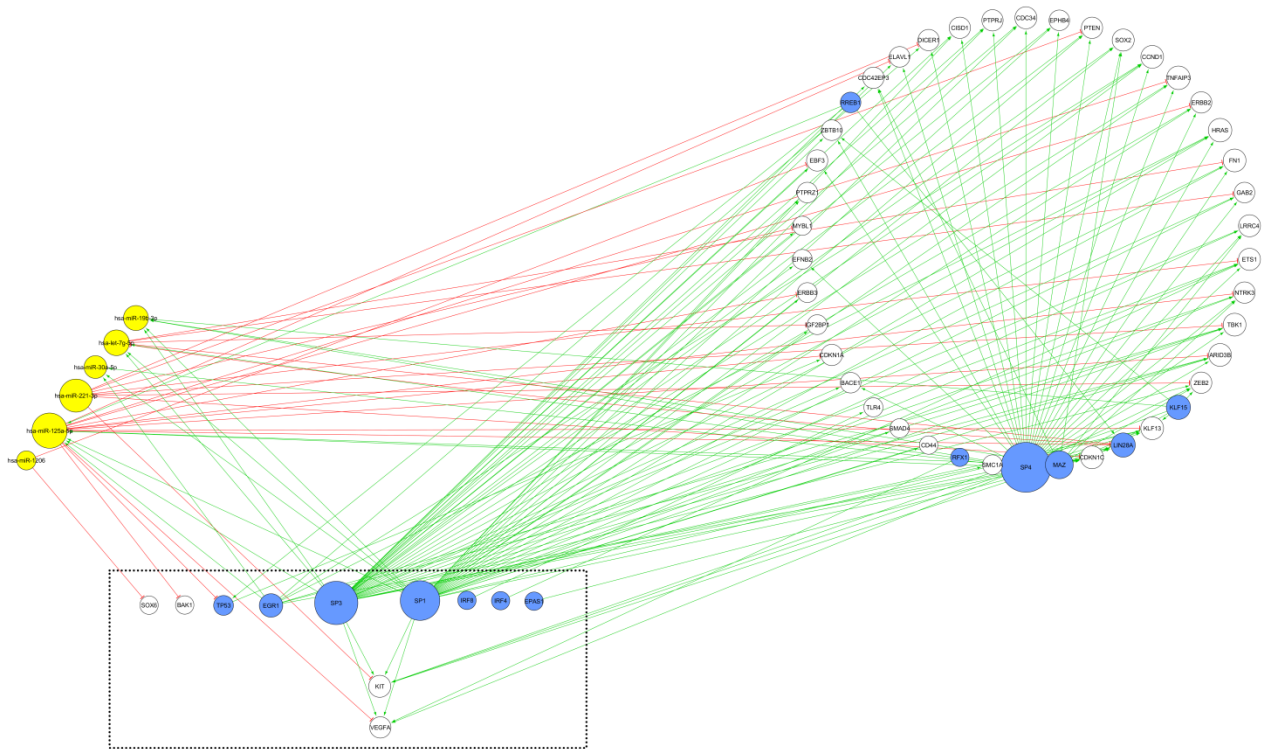

### Supplementary Figure 2: Subnetwork created from GO:0048534: Hemopoietic or lymphoid organ

**development.** The nodes contributing to this enriched GO term are depicted in the dashed box. The microRNAs (miRNAs) associated to these enriched nodes are depicted in yellow on the left hand side of the diagram and the remaining genes associated to the enriched nodes have been circularly arranged on the right hand side. All edges (activating edges in green and repressing ones in red) that were present in the original miRNA-based network between the currently depicted nodes are also present in this subnetwork. The nodes in blue represent transcription factors present in the original miRNA-based network. The greater the size of the node is, the greater the degree of the node is in the original miRNA-based network. The nodes that are white are nodes that are neither miRNAs nor transcription factors in the original miRNA-based network. See **Figure 3** for the complete miRNA-based network.

## Supplementary Figure 3

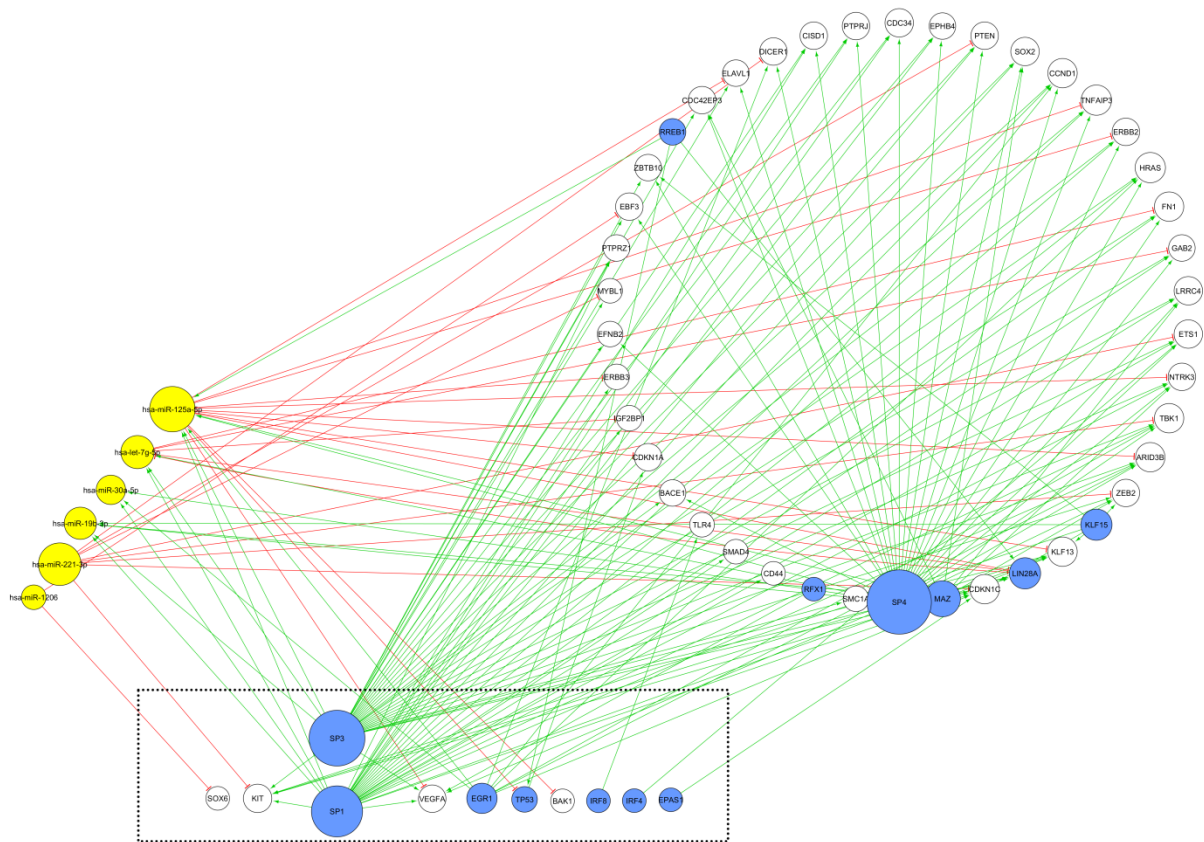

**Supplementary Figure 3: Subnetwork created from GO:0002520: Immune system development.** The nodes contributing to this enriched GO term are depicted in the dashed box. The microRNAs (miRNAs) associated to these enriched nodes are depicted in yellow on the left hand side of the diagram and the remaining genes associated to the enriched nodes have been circularly arranged on the right hand side. All edges (activating edges in green and repressing ones in red) that were present in the original miRNA-based network between the currently depicted nodes are also present in this subnetwork. The nodes in blue represent transcription factors present in the original miRNA-based network. The greater the size of the node is, the greater the degree of the node is in the original miRNA-based network. The nodes that are white are nodes that are neither miRNAs nor transcription factors in the original miRNA-based network. See **Figure 3** for the complete miRNA-based network.

## Supplementary Figure 4

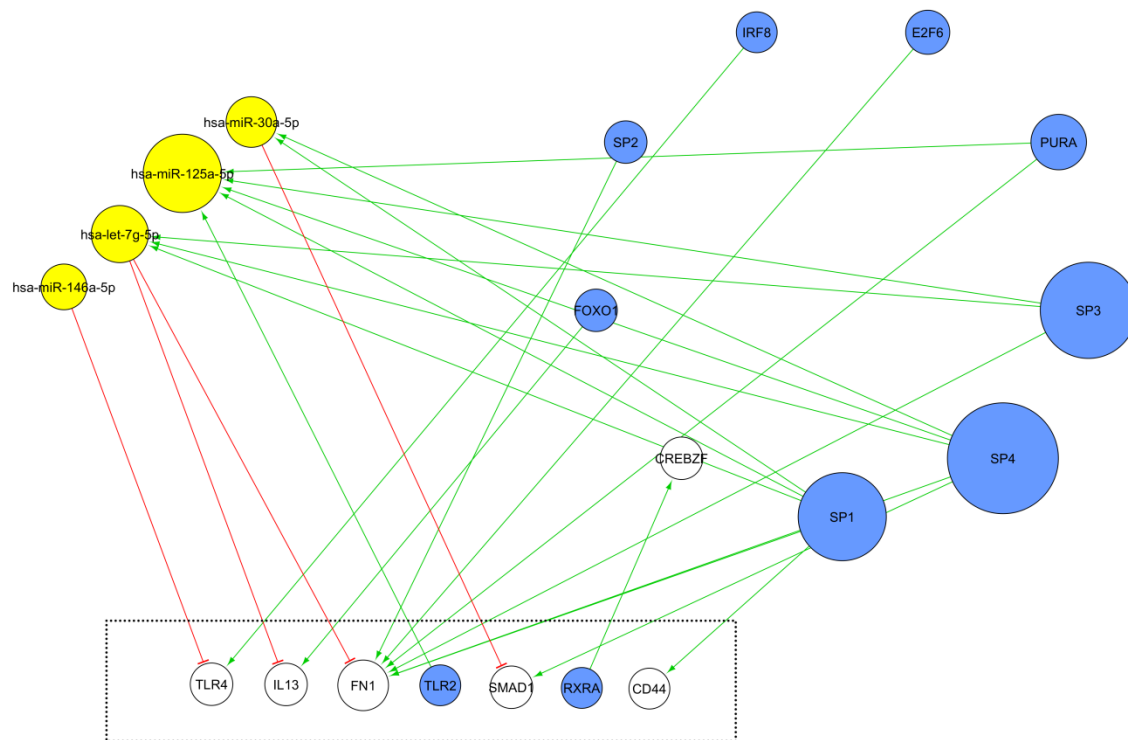

**Supplementary Figure 4: Subnetwork created from GO:0006954: Inflammatory response.** The nodes contributing to this enriched GO term are depicted in the dashed box. The microRNAs (miRNAs) associated to these enriched nodes are depicted in yellow on the left hand side of the diagram and the remaining genes associated to the enriched nodes have been circularly arranged on the right hand side. All edges (activating edges in green and repressing ones in red) that were present in the original miRNA-based network between the currently depicted nodes are also present in this subnetwork. The nodes in blue represent transcription factors present in the original miRNA-based network. The greater the size of the node is, the greater the degree of the node is in the original miRNA-based network. The nodes that are white are nodes that are neither miRNAs nor transcription factors in the original miRNA-based network. See **Figure 3** for the complete miRNA-based network.

## Supplementary Figure 5

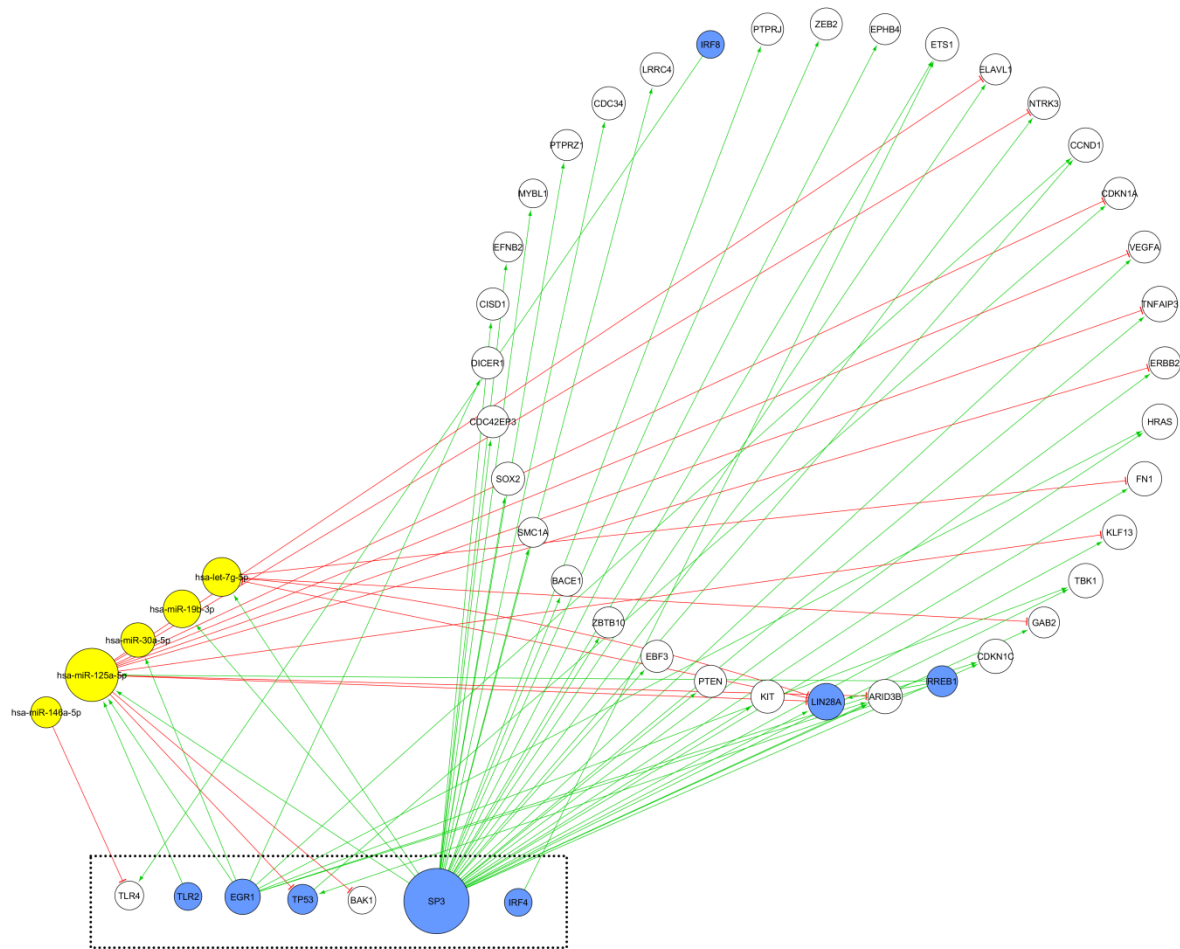

**Supplementary Figure 5: Subnetwork created from GO:0045321: Leukocyte activation.** The nodes contributing to this enriched GO term are depicted in the dashed box. The microRNAs (miRNAs) associated to these enriched nodes are depicted in yellow on the left hand side of the diagram and the remaining genes associated to the enriched nodes have been circularly arranged on the right hand side. All edges (activating edges in green and repressing ones in red) that were present in the original miRNA-based network between the currently depicted nodes are also present in this subnetwork. The nodes in blue represent transcription factors present in the original miRNA-based network. The greater the size of the node is, the greater the degree of the node is in the original miRNA-based network. The nodes that are white are nodes that are neither miRNAs nor transcription factors in the original miRNA-based network. See **Figure 3** for the complete miRNA-based network.

## Supplementary Figure 6

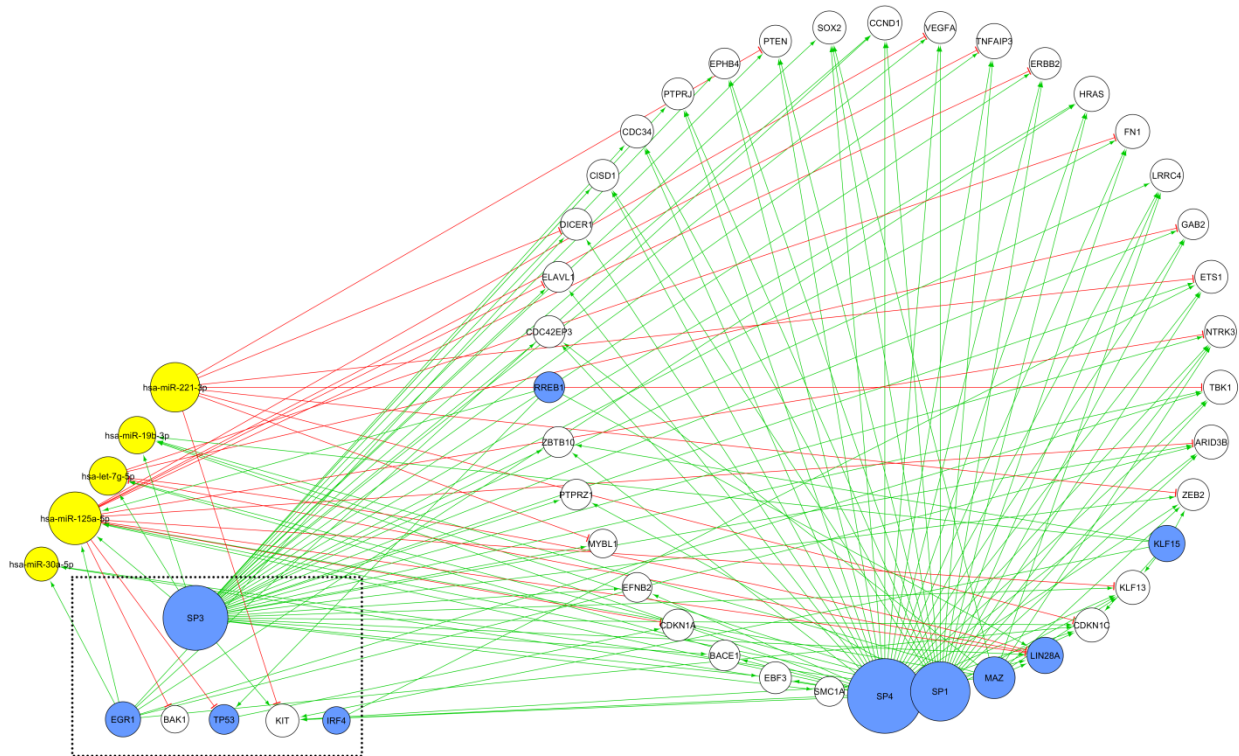

**Supplementary Figure 6: Subnetwork created from GO:0002521: Leukocyte differentiation.** The nodes contributing to this enriched GO term are depicted in the dashed box. The microRNAs (miRNAs) associated to these enriched nodes are depicted in yellow on the left hand side of the diagram and the remaining genes associated to the enriched nodes have been circularly arranged on the right hand side. All edges (activating edges in green and repressing ones in red) that were present in the original miRNA-based network between the currently depicted nodes are also present in this subnetwork. The nodes in blue represent transcription factors present in the original miRNA-based network. The greater the size of the node is, the greater the degree of the node is in the original miRNA-based network. The nodes that are white are nodes that are neither miRNAs nor transcription factors in the original miRNA-based network. See **Figure 3** for the complete miRNA-based network.



## Supplementary Figure 7

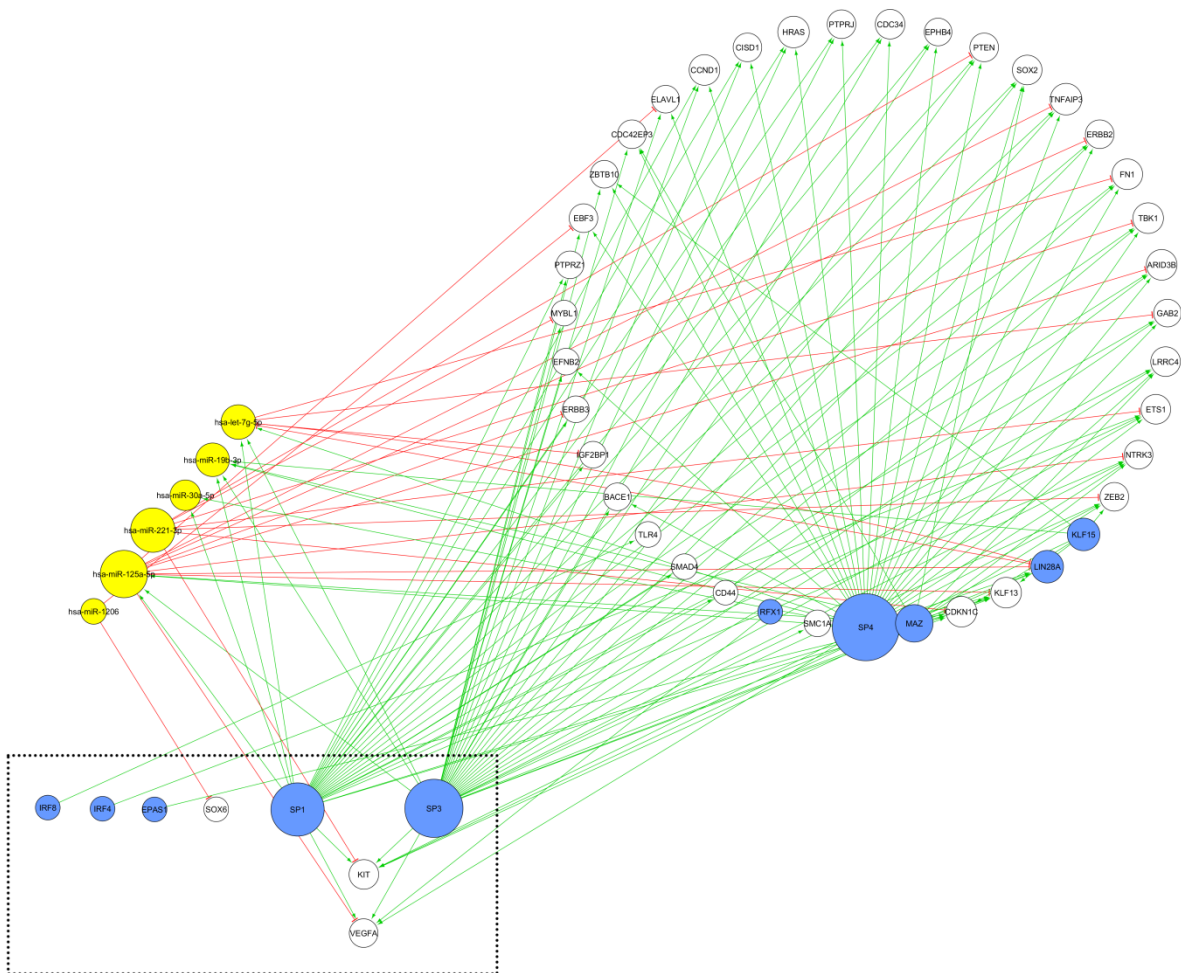

**Supplementary Figure 7: Subnetwork created from GO:0030099: Myeloid cell differentiation.** The nodes contributing to this enriched GO term are depicted in the dashed box. The microRNAs (miRNAs) associated to these enriched nodes are depicted in yellow on the left hand side of the diagram and the remaining genes associated to the enriched nodes have been circularly arranged on the right hand side. All edges (activating edges in green and repressing ones in red) that were present in the original miRNA-based network between the currently depicted nodes are also present in this subnetwork. The nodes in blue represent transcription factors present in the original miRNA-based network. The greater the size of the node is, the greater the degree of the node is in the original miRNA-based network. The nodes that are white are nodes that are neither miRNAs nor transcription factors in the original miRNA-based network. See **Figure 3** for the complete miRNA-based network.

## Supplementary Figure 8

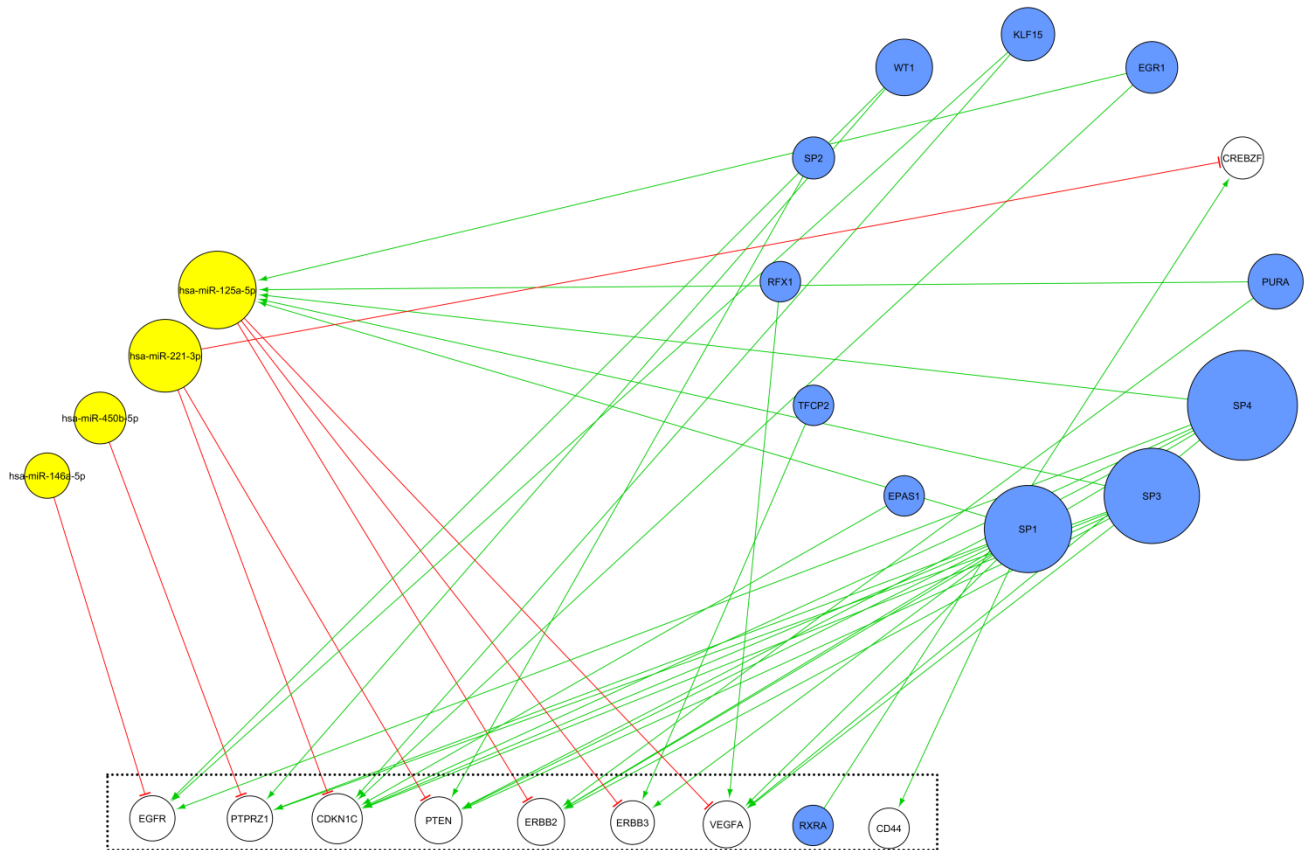

**Supplementary Figure 8: Subnetwork created from GO:0048666: Neuron development.** The nodes contributing to this enriched GO term are depicted in the dashed box. The microRNAs (miRNAs) associated to these enriched nodes are depicted in yellow on the left hand side of the diagram and the remaining genes associated to the enriched nodes have been circularly arranged on the right hand side. All edges (activating edges in green and repressing ones in red) that were present in the original miRNA-based network between the currently depicted nodes are also present in this subnetwork. The nodes in blue represent transcription factors present in the original miRNA-based network. The greater the size of the node is, the greater the degree of the node is in the original miRNA-based network. The nodes that are white are nodes that are neither miRNAs nor transcription factors in the original miRNA-based network. See **Figure 3** for the complete miRNA-based network.

## Supplementary Figure 9

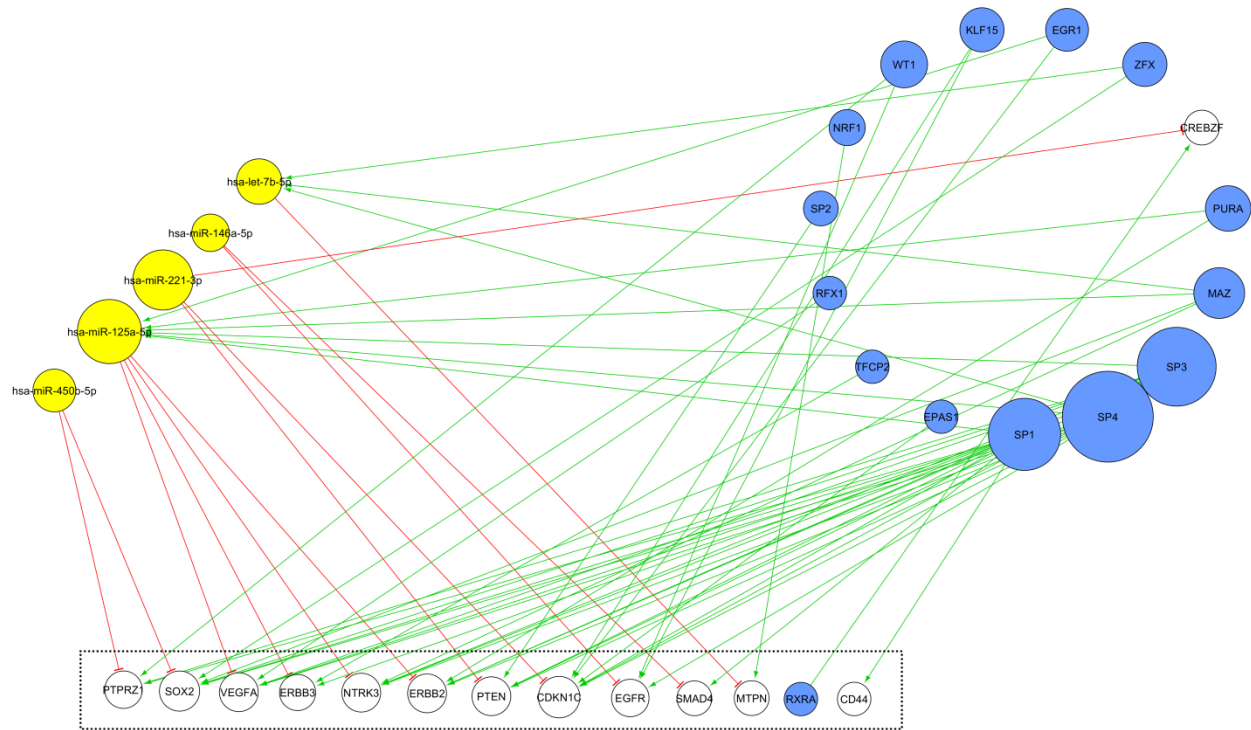

**Supplementary Figure 9: Subnetwork created from GO:0030182: Neuron differentiation.** The nodes contributing to this enriched GO term are depicted in the dashed box. The microRNAs (miRNAs) associated to these enriched nodes are depicted in yellow on the left hand side of the diagram and the remaining genes associated to the enriched nodes have been circularly arranged on the right hand side. All edges (activating edges in green and repressing ones in red) that were present in the original miRNA-based network between the currently depicted nodes are also present in this subnetwork. The nodes in blue represent transcription factors present in the original miRNA-based network. The greater the size of the node is, the greater the degree of the node is in the original miRNA-based network. The nodes that are white are nodes that are neither miRNAs nor transcription factors in the original miRNA-based network. See **Figure 3** for the complete miRNA-based network.

## Supplementary Figure 10

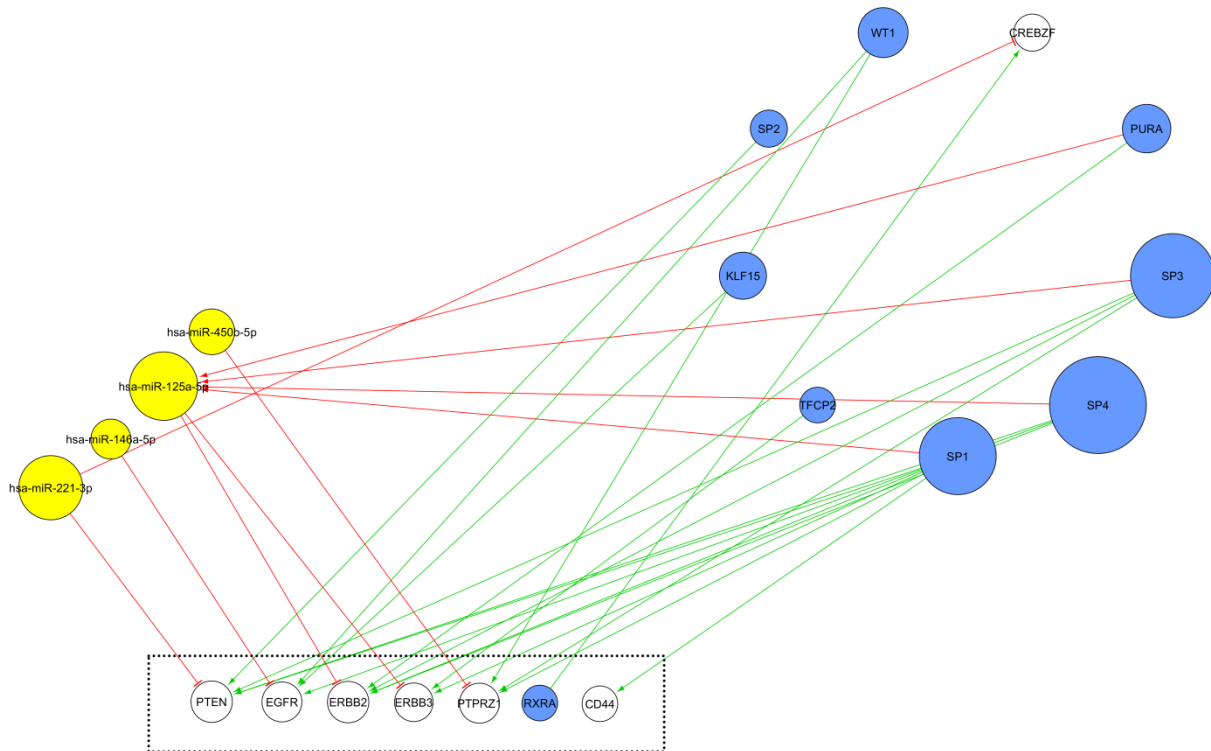

**Supplementary Figure 10: Subnetwork created from GO:0031175: Neuron projection development.** The nodes contributing to this enriched GO term are depicted in the dashed box. The microRNAs (miRNAs) associated to these enriched nodes are depicted in yellow on the left hand side of the diagram and the remaining genes associated to the enriched nodes have been circularly arranged on the right hand side. All edges (activating edges in green and repressing ones in red) that were present in the original miRNA-based network between the currently depicted nodes are also present in this subnetwork. The nodes in blue represent transcription factors present in the original miRNA-based network. The greater the size of the node is, the greater the degree of the node is in the original miRNA-based network. The nodes that are white are nodes that are neither miRNAs nor transcription factors in the original miRNA-based network. See **Figure 3** for the complete miRNA-based network.

## Supplementary Figure 11

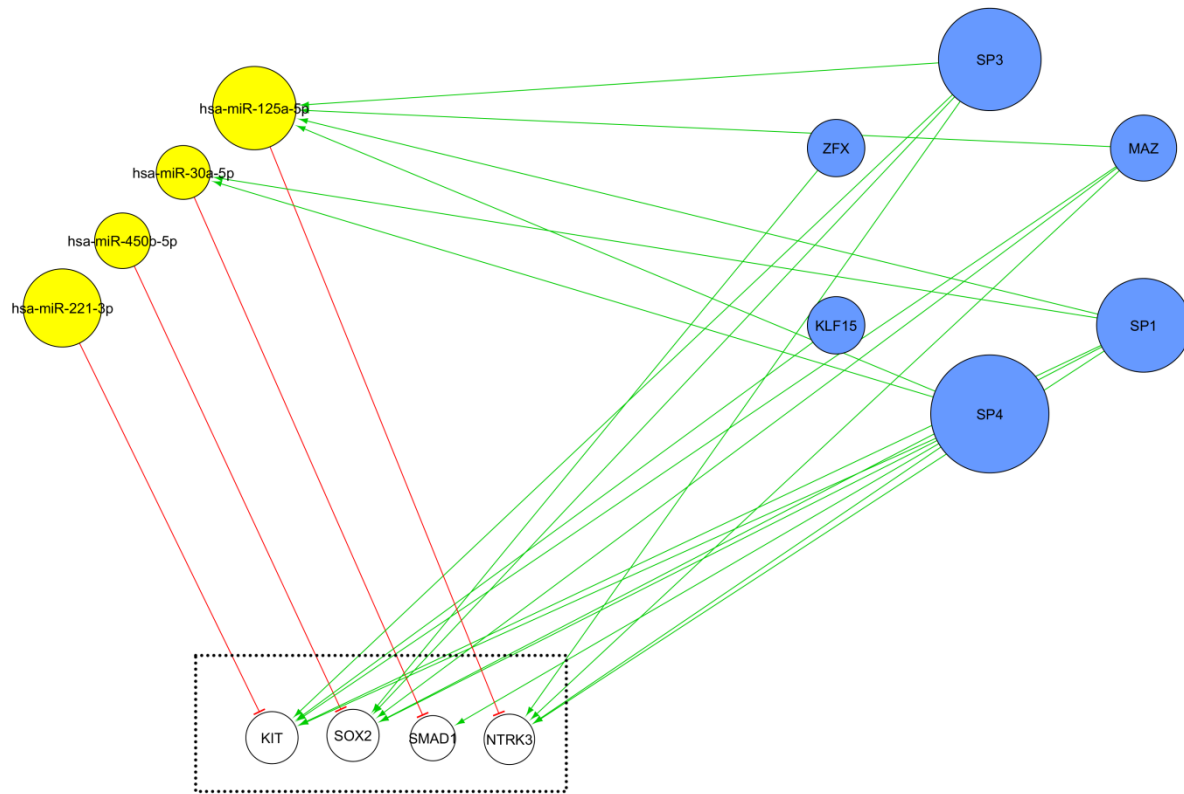

**Supplementary Figure 11: Subnetwork created from GO:0050769: Positive regulation of neurogenesis.** The nodes contributing to this enriched GO term are depicted in the dashed box. The microRNAs (miRNAs) associated to these enriched nodes are depicted in yellow on the left hand side of the diagram and the remaining genes associated to the enriched nodes have been circularly arranged on the right hand side. All edges (activating edges in green and repressing ones in red) that were present in the original miRNA-based network between the currently depicted nodes are also present in this subnetwork. The nodes in blue represent transcription factors present in the original miRNA-based network. The greater the size of the node is, the greater the degree of the node is in the original miRNA-based network. The nodes that are white are nodes that are neither miRNAs nor transcription factors in the original miRNA-based network. See **Figure 3** for the complete miRNA-based network.

## Supplementary Figure 12

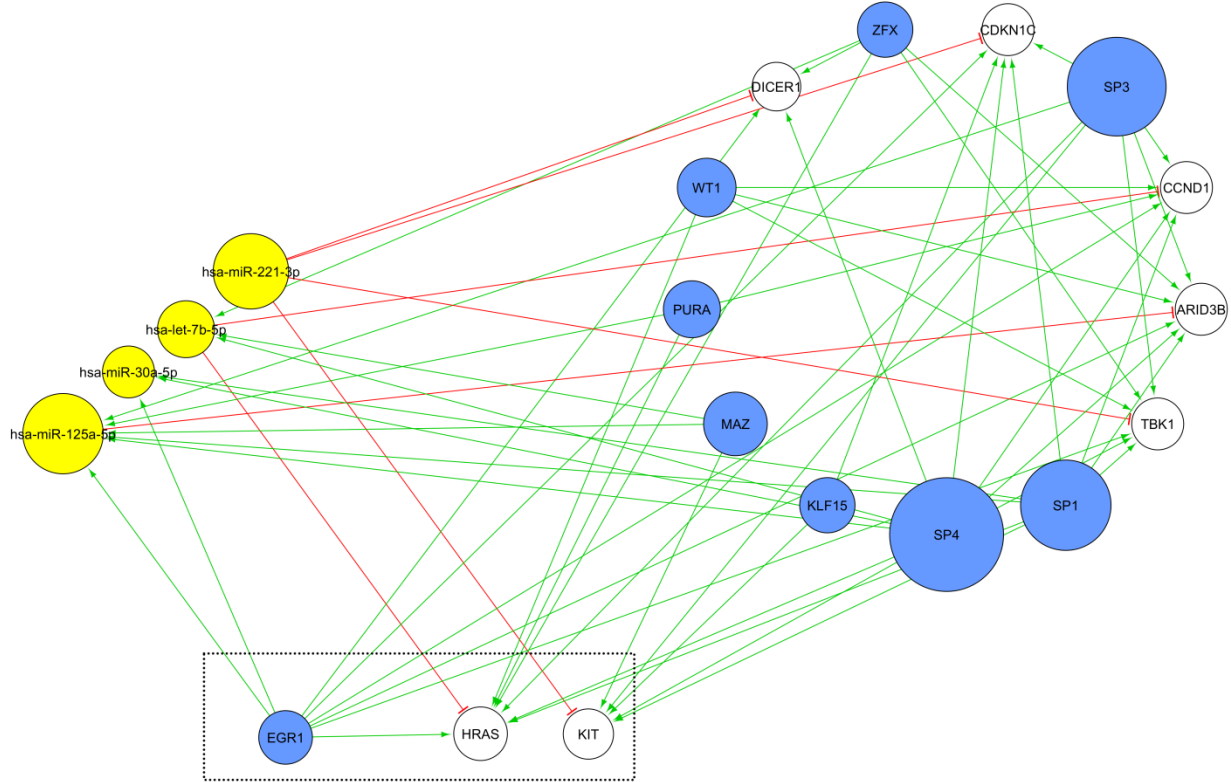

**Supplementary Figure 12: Subnetwork created from GO:0048169: Regulation of long-term neuronal synaptic plasticity.** The nodes contributing to this enriched GO term are depicted in the dashed box. The microRNAs (miRNAs) associated to these enriched nodes are depicted in yellow on the left hand side of the diagram and the remaining genes associated to the enriched nodes have been circularly arranged on the right hand side. All edges (activating edges in green and repressing ones in red) that were present in the original miRNA-based network between the currently depicted nodes are also present in this subnetwork. The nodes in blue represent transcription factors present in the original miRNA-based network. The greater the size of the node is, the greater the degree of the node is in the original miRNA-based network. The nodes that are white are nodes that are neither miRNAs nor transcription factors in the original miRNA-based network. See **Figure 3** for the complete miRNA-based network.

## Supplementary Figure 13

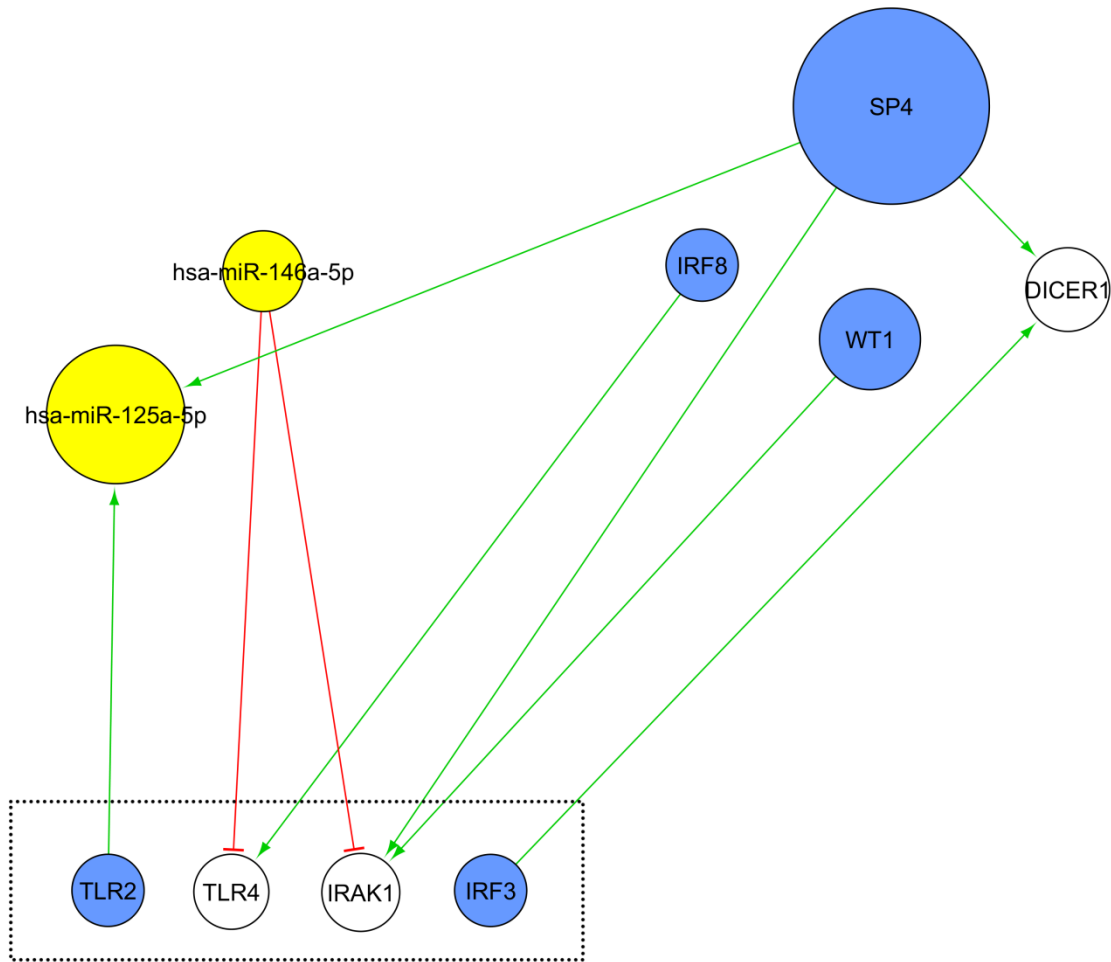

### Supplementary Figure 13: Subnetwork created from GO:0002237: Response to molecule of bacterial origin.

The nodes contributing to this enriched GO term are depicted in the dashed box. The microRNAs (miRNAs) associated to these enriched nodes are depicted in yellow on the left hand side of the diagram and the remaining genes associated to the enriched nodes have been circularly arranged on the right hand side. All edges (activating edges in green and repressing ones in red) that were present in the original miRNA-based network between the currently depicted nodes are also present in this subnetwork. The nodes in blue represent transcription factors present in the original miRNA-based network. The greater the size of the node is, the greater the degree of the node is in the original miRNA-based network. The nodes that are white are nodes that are neither miRNAs nor transcription factors in the original miRNA-based network. See **Figure 3** for the complete miRNA-based network.

## Supplementary Figure 14

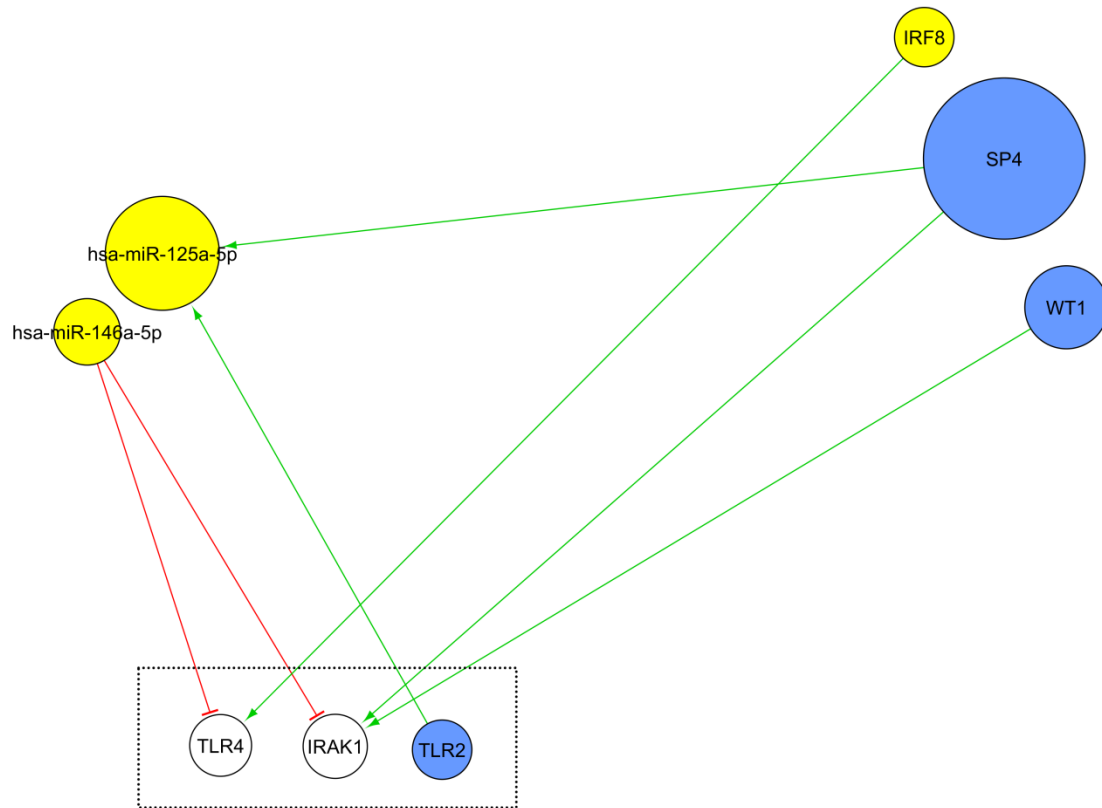

**Supplementary Figure 14: Subnetwork created from either GO:0002218: Activation of innate immune response, from GO:0002758: Innate immune response- activating signal transduction, or from GO:0002224:Toll-like receptor signaling pathway.** These three GO terms are associated to the same enriched nodes: TLR2, TLR4, and IRAK1. The nodes contributing to this enriched GO term are depicted in the dashed box. The microRNAs (miRNAs) associated to these enriched nodes are depicted in yellow on the left hand side of the diagram and the remaining genes associated to the enriched nodes have been circularly arranged on the right hand side. All edges (activating edges in green and repressing ones in red) that were present in the original miRNA-based network between the currently depicted nodes are also present in this subnetwork. The nodes in blue represent transcription factors present in the original miRNA-based network. The greater the size of the node is, the greater the degree of the node is in the original miRNA-based network. The nodes that are white are nodes that are neither miRNAs nor transcription factors in the original miRNA-based network. See **Figure 3** for the complete miRNA-based network.



# Supplementary Figure 15

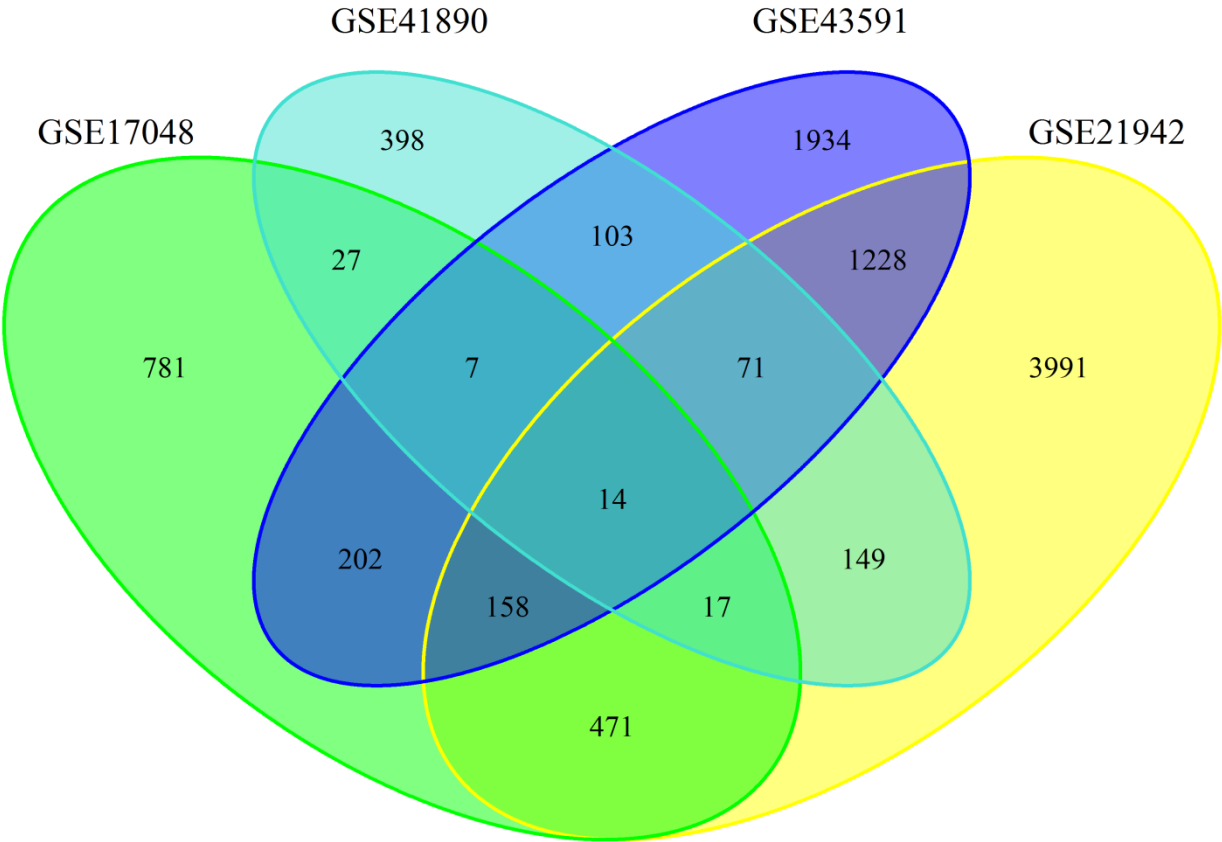

**Supplementary Figure 15: Venn diagram of overlapping differentially expressed protein-coding genes with a p-value<0.05 per dataset.** This figure depicts the overlap of the differentially expressed genes with a p-value<0.05 between the different. The direction in which the genes were regulated was not taken into consideration to construct this Venn diagram.

## Supplementary Table 1

| miRNA       | Target  | miRNA       | Target  |
|-------------|---------|-------------|---------|
| let-7b-5p   | CCND1   | miR-125a-5p | NTRK3   |
| let-7b-5p   | CDC34   | miR-125a-5p | TNFAIP3 |
| let-7b-5p   | HRAS    | miR-125a-5p | TP53    |
| let-7b-5p   | IGF2BP1 | miR-125a-5p | VEGFA   |
| let-7b-5p   | LIN28A  | miR-146a-5p | EGFR    |
| let-7b-5p   | MTPN    | miR-146a-5p | IRAK1   |
| let-7g-5p   | FN1     | miR-146a-5p | SMAD4   |
| let-7g-5p   | GAB2    | miR-146a-5p | TLR4    |
| let-7g-5p   | HMGA2   | miR-221-3p  | BNIP3L  |
| let-7g-5p   | IGF2BP1 | miR-221-3p  | CDKN1B  |
| let-7g-5p   | IL13    | miR-221-3p  | CDKN1C  |
| miR-19b-3p  | CUL5    | miR-221-3p  | CREBZF  |
| miR-19b-3p  | MYCN    | miR-221-3p  | DDIT4   |
| miR-20b-5p  | CDKN1A  | miR-221-3p  | DICER1  |
| miR-20b-5p  | EFNB2   | miR-221-3p  | DIRAS3  |
| miR-20b-5p  | EPHB4   | miR-221-3p  | DKK2    |
| miR-30a-5p  | BECN1   | miR-221-3p  | ETS1    |
| miR-30a-5p  | DTL     | miR-221-3p  | KIT     |
| miR-30a-5p  | RUNX2   | miR-221-3p  | MYBL1   |
| miR-30a-5p  | SMAD1   | miR-221-3p  | PSMD9   |
| miR-125a-5p | ARID3B  | miR-221-3p  | PTEN    |
| miR-125a-5p | BAK1    | miR-221-3p  | TBK1    |
| miR-125a-5p | CD34    | miR-221-3p  | TIMP3   |
| miR-125a-5p | CDKN1A  | miR-221-3p  | ZEB2    |
| miR-125a-5p | ELAVL1  | miR-328     | ABCG2   |
| miR-125a-5p | ERBB2   | miR-328     | BACE1   |
| miR-125a-5p | ERBB3   | miR-328     | CD44    |
| miR-125a-5p | KLF13   | miR-328     | H2AFX   |
| miR-125a-5p | LIN28A  | miR-328     | PTPRJ   |

### Supplementary Table 1: Validated microRNA-target pairs that were included in the microRNA-based

**network.** The validated microRNA-target pairs were found using miRTarBase, Release 3.5, and TarBase, Release 6.0, for the microRNA-based network<sup>1,2</sup>. The target pairs were found using the 18 miRNAs that were differentially expressed and dysregulated in the same direction in at least 3 of the 4 microRNA microarray datasets (see **Tables 1 and 2**).

## Supplementary Table 2

| miRNA       | Target | miRNA       | Target   | miRNA       | Target |
|-------------|--------|-------------|----------|-------------|--------|
| miR-125a-5p | ENPEP  | miR-300     | TRIM63   | miR-450b-5p | SOX2   |
| miR-300     | ANO4   | miR-300     | VASH2    | miR-450b-5p | UBR1   |
| miR-300     | DCAF12 | miR-450b-5p | ATP11C   | miR-450b-5p | ZBTB10 |
| miR-300     | LCORL  | miR-450b-5p | CDC42EP3 | miR-580     | CISD1  |
| miR-300     | LRRC4  | miR-450b-5p | ELAVL4   | miR-580     | FGF7   |
| miR-300     | NR5A2  | miR-450b-5p | PTPRZ1   | miR-1206    | EBF3   |
| miR-300     | PAN3   | miR-450b-5p | SMC1A    | miR-1206    | SOX6   |

**Supplementary Table 2: Predicted miRNA-target pairs that were included in the miRNA-based network.** The predicted miRNA-target pairs were found using TargetScan, Release 6.2, miRDB, Release 4.0, and microT-CDS, Release 5.0<sup>3-5</sup>. The target pairs were found using the 18 miRNAs that were differentially expressed and dysregulated in the same direction in at least 3 of the 4 microRNA microarray datasets (see **Tables 1 and 2**).

### Supplementary Table 3

| TF    | miRNA       | TF  | miRNA       |
|-------|-------------|-----|-------------|
| E2F6  | miR-19b-3p  | SP1 | miR-19b-3p  |
| EGR4  | miR-125a-5p | SP1 | miR-30a-5p  |
| GABPA | miR-328     | SP3 | let-7g-5p   |
| KLF15 | miR-19b-3p  | SP3 | miR-19b-3p  |
| KLF15 | miR-20b-5p  | SP3 | miR-125a-5p |
| MAZ   | miR-125a-5p | SP4 | let-7g-5p   |
| MAZ   | let-7b-5p   | SP4 | miR-125a-5p |
| MAZ   | miR-19b-3p  | SP4 | let-7b-5p   |
| PLAG1 | miR-125a-5p | SP4 | miR-19b-3p  |
| PURA  | miR-125a-5p | SP4 | miR-30a-5p  |
| RREB1 | miR-125a-5p | TEF | miR-221-3p  |
| SP1   | let-7g-5p   | ZFX | let-7b-5p   |
| SP1   | miR-125a-5p |     |             |

**Supplementary Table 3: Predicted transcription factor and miRNA interaction pairs found using FIMO<sup>6</sup> in combination with HOCOMOCO<sup>7</sup>.** FIMO<sup>6</sup> and HOCOMOCO<sup>7</sup> were used in order to find predicted miRNA targets of the transcription factors (TFs) in HOCOMOCO<sup>7</sup>. The target pairs were found using the 18 miRNAs that were differentially expressed and dysregulated in the same direction in at least 3 of the 4 microRNA microarray datasets (see **Tables 1 and 2**).

## Supplementary Table 4

| TF    | Gene     | TF    | Gene     | TF  | Gene     |
|-------|----------|-------|----------|-----|----------|
| ARNT2 | ABCG2    | PURA  | ERBB2    | SP3 | EPHB4    |
| CTCF  | CUL5     | PURA  | FN1      | SP3 | ERBB2    |
| CTCF  | TNFAIP3  | PURA  | HRAS     | SP3 | ESR1     |
| E2F4  | SRSF1    | PURA  | LCORL    | SP3 | ETS1     |
| E2F6  | ETS1     | PURA  | LIN28A   | SP3 | FN1      |
| E2F6  | FN1      | PURA  | LRRRC4   | SP3 | GAB2     |
| EGR1  | ARID3B   | RFX1  | VEGFA    | SP3 | HRAS     |
| EGR1  | CCND1    | RREB1 | DCAF12   | SP3 | KIT      |
| EGR1  | CDKN1C   | RREB1 | LIN28A   | SP3 | KLF13    |
| EGR1  | DICER1   | RREB1 | TP53     | SP3 | LIN28A   |
| EGR1  | HRAS     | RXRA  | CREBZF   | SP3 | LRRRC4   |
| EGR1  | TBK1     | SP1   | ARID3B   | SP3 | MYBL1    |
| EGR4  | EBF3     | SP1   | CCND1    | SP3 | NTRK3    |
| ELK3  | NR5A2    | SP1   | CD44     | SP3 | PTEN     |
| EPAS1 | CDKN1C   | SP1   | CDC34    | SP3 | PTPRJ    |
| FOS   | LIN28A   | SP1   | CDKN1C   | SP3 | PTPRZ1   |
| FOXO1 | CDKN1A   | SP1   | CISD1    | SP3 | SMC1A    |
| FOXO1 | IL13     | SP1   | EPHB4    | SP3 | SOX2     |
| IRF3  | DICER1   | SP1   | ERBB2    | SP3 | TBK1     |
| IRF4  | ETS1     | SP1   | ERBB3    | SP3 | TNFAIP3  |
| IRF8  | TLR4     | SP1   | ESR1     | SP3 | VEGFA    |
| KLF15 | CDKN1C   | SP1   | ETS1     | SP3 | ZBTB10   |
| KLF15 | DCAF12   | SP1   | FN1      | SP3 | ZEB2     |
| KLF15 | EGFR     | SP1   | GAB2     | SP4 | ARID3B   |
| KLF15 | KIT      | SP1   | HRAS     | SP4 | BACE1    |
| KLF15 | KLF13    | SP1   | IGF2BP1  | SP4 | CCND1    |
| KLF15 | ZBTB10   | SP1   | KIT      | SP4 | CDC34    |
| KLF15 | ZEB2     | SP1   | KLF13    | SP4 | CDC42EP3 |
| MAZ   | CDC42EP3 | SP1   | LIN28A   | SP4 | CDKN1B   |
| MAZ   | ELAVL4   | SP1   | LRRRC4   | SP4 | CDKN1C   |
| MAZ   | KIT      | SP1   | NTRK3    | SP4 | CISD1    |
| MAZ   | KLF13    | SP1   | PTEN     | SP4 | DCAF12   |
| MAZ   | LCORL    | SP1   | PTPRJ    | SP4 | DICER1   |
| MAZ   | LIN28A   | SP1   | PTPRZ1   | SP4 | EBF3     |
| MAZ   | LRRRC4   | SP1   | SMAD4    | SP4 | EFNB2    |
| MAZ   | NTRK3    | SP1   | SOX2     | SP4 | EGFR     |
| MAZ   | PAN3     | SP1   | TBK1     | SP4 | ELAVL1   |
| MAZ   | SOX2     | SP1   | TNFAIP3  | SP4 | EPHB4    |
| MAZ   | ZEB2     | SP1   | VEGFA    | SP4 | ERBB2    |
| NRF1  | BNIP3L   | SP2   | FN1      | SP4 | ESR1     |
| NRF1  | CDC34    | SP2   | PTEN     | SP4 | ETS1     |
| NRF1  | MTPN     | SP3   | ARID3B   | SP4 | FN1      |
| PAX5  | TNFAIP3  | SP3   | BACE1    | SP4 | GAB2     |
| PAX8  | TNFAIP3  | SP3   | CCND1    | SP4 | HRAS     |
| PLAG1 | ABCG2    | SP3   | CDC34    | SP4 | IRAK1    |
| PPARD | CDC34    | SP3   | CDC42EP3 | SP4 | KIT      |
| PRDM1 | ATP11C   | SP3   | CDKN1C   | SP4 | KLF13    |
| PURA  | BACE1    | SP3   | CISD1    | SP4 | LIN28A   |
| PURA  | CCND1    | SP3   | EBF3     | SP4 | LRRRC4   |
| PURA  | CD34     | SP3   | EFNB2    | SP4 | MYCN     |
| PURA  | CDC42EP3 | SP3   | ELAVL1   | SP4 | NR5A2    |

|       |         |       |        |     |         |
|-------|---------|-------|--------|-----|---------|
| SP4   | NTRK3   | TBX2  | CDKN1A | WT1 | PTPRJ   |
| SP4   | PAN3    | TBX2  | SMC1A  | WT1 | PTPRZ1  |
| SP4   | PTEN    | TBX2  | TRIM63 | WT1 | TBK1    |
| SP4   | PTPRJ   | TFCP2 | ERBB3  | ZFX | ARID3B  |
| SP4   | RUNX2   | TP53  | CDKN1A | ZFX | DICER1  |
| SP4   | SMAD1   | WT1   | ARID3B | ZFX | EBF3    |
| SP4   | SOX2    | WT1   | CCND1  | ZFX | ELAVL1  |
| SP4   | TBK1    | WT1   | CISD1  | ZFX | HRAS    |
| SP4   | TNFAIP3 | WT1   | EGFR   | ZFX | SOX2    |
| SP4   | VEGFA   | WT1   | HRAS   | ZFX | TBK1    |
| SP4   | ZBTB10  | WT1   | IRAK1  | ZFX | TNFAIP3 |
| SP4   | ZEB2    | WT1   | KLF13  |     |         |
| STAT4 | MYCN    | WT1   | MYCN   |     |         |

---

**Supplementary Table 4: Predicted transcription factor and gene interaction pairs found using FIMO<sup>6</sup> in**

**combination with HOCOMOCO<sup>7</sup>.** FIMO<sup>6</sup> and HOCOMOCO<sup>7</sup> were used in order to find predicted targets of the transcription factors (TFs) in HOCOMOCO<sup>7</sup> for the microRNA-based network.

## Supplementary Table 5

|             |          |              |               |
|-------------|----------|--------------|---------------|
| AAMP        | DDOST    | MED9         | RAP2B         |
| ABHD15      | DDX50    | MESDC1       | RBBP6         |
| ADRB2       | DEDD2    | METTL5       | REPS1         |
| AKT3        | DUSP12   | MFAP1        | RGS9          |
| ALG2        | DYNLL2   | MIP          | RGS9BP        |
| ARAP1       | EIF2AK2  | MIPEP        | RRAD          |
| <b>BEX1</b> | EIF3M    | MRPL1        | SIGLEC17P     |
| <b>BEX2</b> | EIF4A2   | MRPL27       | SLC25A21      |
| BLCAP       | EIF4EBP2 | MRPL41       | SLC39A14      |
| BRIX1       | EIF4G1   | MRPS27       | SNRPA1        |
| BUB1        | ELF4     | NAA30        | SOAT1         |
| C19orf43    | ELMO2    | NCOA6        | SRP72         |
| CA5B        | EMC1     | NCOR1        | SRPRB         |
| CAMK2N1     | ERCC4    | NDC80        | SWT1          |
| CASC3       | EXT2     | NLRP3        | TBC1D20       |
| CASP9       | EXT3     | NOP58        | TES           |
| CCDC59      | F8A1     | NSMCE4A      | TMEM107       |
| CD244       | FAM122A  | ODC1         | TNPO1         |
| CD69        | GALNT6   | ORC3         | TOP2A         |
| CDK2AP2     | GIGYF2   | <b>PALLD</b> | TOR1AIP1      |
| CERS6       | GPBP1    | PAPOLG       | TSEN34        |
| CHSY1       | HNRNPH3  | PLEKHF1      | TUBB          |
| CLIC3       | HSPA1A   | PMAIP1       | UBE2G1        |
| CORO1A      | ICAM3    | POLDIP3      | UPF1          |
| CRBN        | IFNAR1   | PPP1CA       | UXT           |
| CSTF2T      | IFT74    | PPP1R18      | VKORC1L1      |
| CTDSP2      | KRR1     | PPWD1        | VPS37C        |
| CXCR3       | LARP7    | PRDX5        | VRK1          |
| DCAF4       | LPCAT1   | RAB21        | YWHAG         |
| DCAF7       | MAFIP    | RAB5B        | ZBTB34        |
| DCTN6       | MAPK1    | RAC1         | <b>ZNF264</b> |
| DDIT3       | MATR3    | RAD1         | ZNF777        |

**Supplementary Table 5: Differentially expressed genes.** 128 genes that were differentially expressed in at least 3 of the 4 protein-coding microarrays and that were regulated in the same direction (**Table 1**). Genes in bold represent genes that were differentially expressed and regulated in the same direction in all four protein-coding microarray datasets.

## References

1. Hsu, S.-D. *et al.* miRTarBase: a database curates experimentally validated microRNA-target interactions. *Nucleic Acids Res.* **39**, D163–D169 (2011).
2. Vergoulis, T. *et al.* TarBase 6.0: capturing the exponential growth of miRNA targets with experimental support. *Nucleic Acids Res.* **40**, D222–D229 (2012).
3. Grimson, A. *et al.* MicroRNA targeting specificity in mammals: determinants beyond seed pairing. *Mol. Cell* **27**, 91–105 (2007)
4. Wang, X. & El Naqa, I. M. Prediction of both conserved and nonconserved microRNA targets in animals. *Bioinformatics* **24**, 325–332 (2008).
5. Paraskevopoulou, M. D. *et al.* DIANA-microT web server v5.0: service integration into miRNA functional analysis workflows. *Nucleic Acids Res.* **41**, W169–W173 (2013).
6. Grant, C. E., Bailey, T. L. & Noble, W. S. FIMO: scanning for occurrences of a given motif. *Bioinformatics* **27**, 1017–1018 (2011).
7. Kulakovskiy, I. V *et al.* HOCOMOCO: a comprehensive collection of human transcription factor binding sites models. *Nucleic Acids Res.* **41**, D195–D202 (2013).
